# Supplementary material for: Enzyme intermediates captured “on the fly” by mix-and-inject serial crystallography
Source: PubMed Central journal article supplement (PMC5977757; doi:10.1186/s12915-018-0524-5), 2018-05-31
Supplement: 12915_2018_524_MOESM1_ESM.pdf [file 12915_2018_524_MOESM1_ESM.pdf]

- 1 **Additional file 1.**
- 2 **Supplementary Figures S1-S12 and Table S1 for “Enzyme**
- 3 **Intermediates Captured on-the-fly by Mix-and-Inject Serial**
- 4 **Crystallography”**
- 5

6  
7

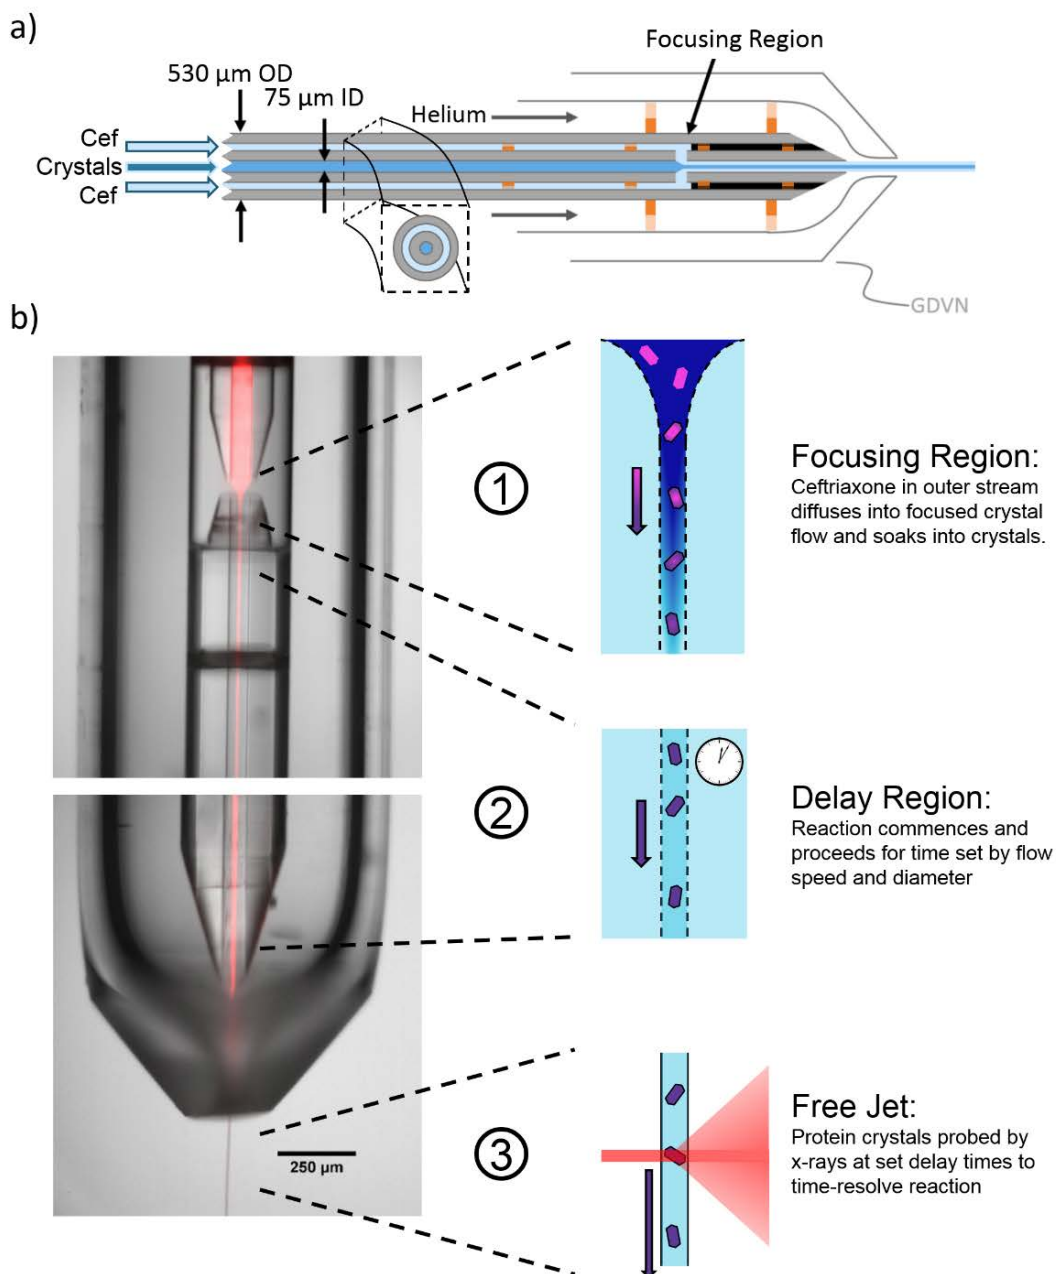

**Figure S1.** a) Schematic of short timepoint mixing injector. Capillary dimensions vary by timepoint. b) Composite image of fluorescent dye flowing through the sample capillary and water flowing through the buffer capillary. Cartoons illustrate the operating principle of each region of the device.

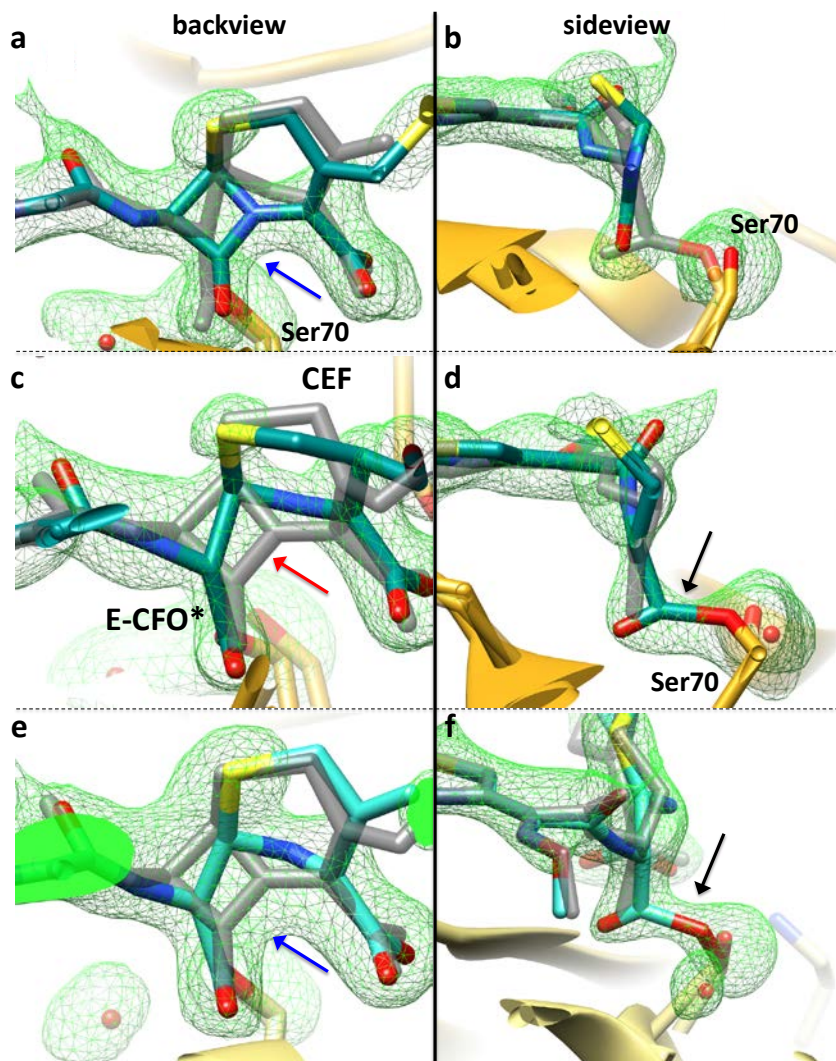

8 **Figure S2.** Selected views on the CEF binding site in the BlaC shard crystal form at  
 9 various time delays. mFo-DFc SA omit electron density (green) contoured at  $2.5\sigma$ . The  
 10 first column shows the view on  $\beta$ -lactam ring from the backside in relation to Fig. 2 in the  
 11 main text. The second column shows the side view to demonstrate cleavage of the lactam  
 12 ring, and the covalent bond formation to Ser-70. The electron density is interpreted with  
 13 two species (major species in blue, minor species in gray). **(a, b)** Electron density at  
 14 100ms in the BlaC shard crystal form, subunit B. The non-covalently bound, full length  
 15 CEF is the main species (60%). The closed, uncleaved  $\beta$ -lactam ring nicely fits the  
 16 electron density (a, blue arrow). The electron density between SER 70 and the open  
 17 lactam ring is weak (b). The concentration of the covalently bound acyl adduct (E-CFO\*)  
 18 is low (40%). **(c, d)** Electron density at 500ms in the BlaC shard crystal form, subunit B.  
 19 A covalently bound species (E-CFO\*), where the  $\beta$ -lactam ring is opened, and the leaving  
 20 group is split off, is the main species (blue, 70%). **(c)** The closed  $\beta$ -lactam ring poorly fits  
 21 the electron density (red arrow), and the electron density is interpreted by an open lactam

22 ring (c). Strong electron density between SER 70 and the carboxyl of cleaved lactam ring  
23 indicates a covalent bond (d, black arrow). **(e, f)** Electron density at 500ms in the BlaC  
24 shard crystal form, subunit D. The full length CEF, and the E-CFO\* acyl adduct are  
25 present approximately at equal proportions (50/50). The  $\beta$ -lactam ring fits nicely in the  
26 electron density (blue arrow), which can be interpreted by an uncleaved, full length CEF  
27 structure (e). However, in (f), strong electron density between the SER 70 and the cleaved  
28 open lactam ring (black arrow) indicates mixing-in of a covalently bound E-CFO\* species.

29

30

31

32

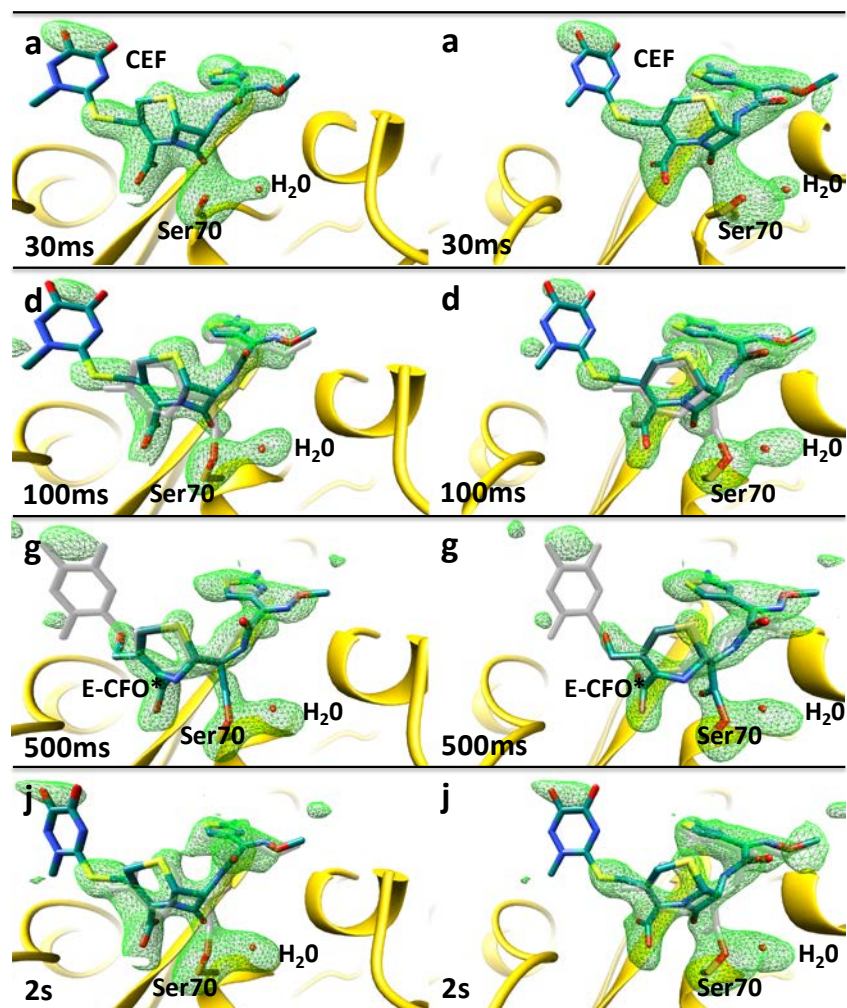

33 **Figure S3.** Simulated annealing omit maps, shard crystal form, subunit B (stereo  
 34 representation) of the BlaC reaction with ceftriaxone, from 30 ms to 2 s. Panels are  
 35 labeled with the same letters as in Fig. 2 (main text). Green: SA-omit difference density  
 36 (2.5  $\sigma$  contour). Blue: ligand main structural component, gray: minor structural  
 37 component.

38

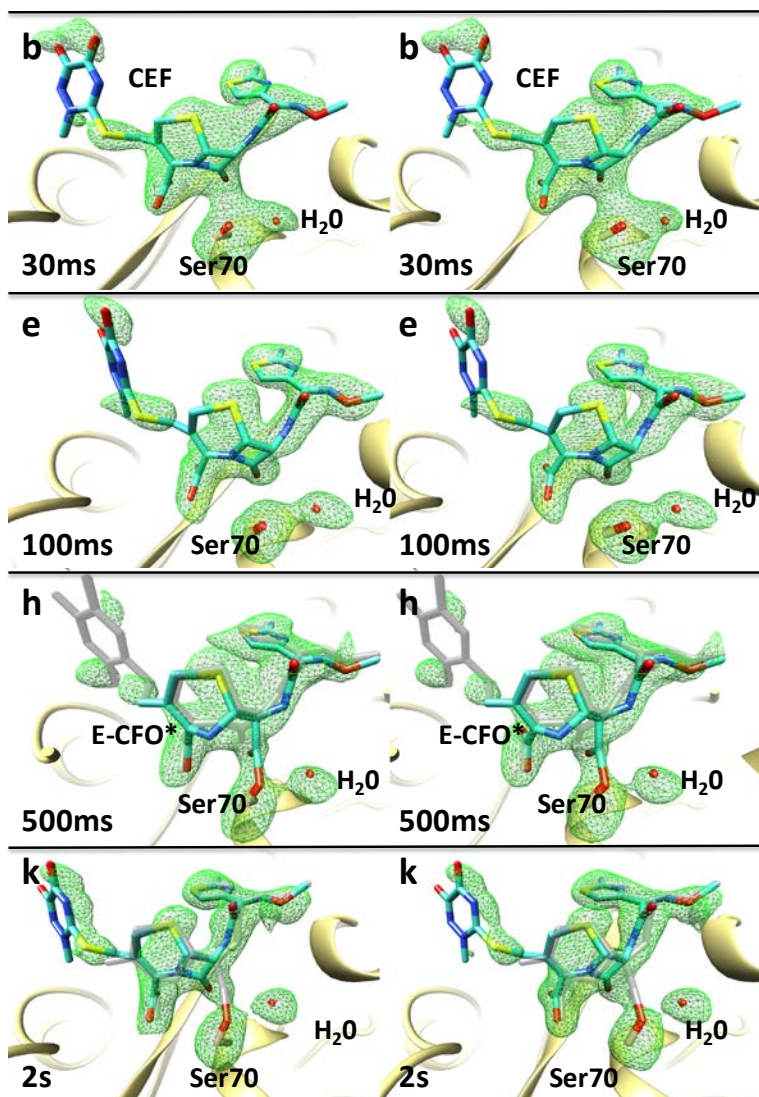

40 **Figure S4.** Simulated annealing omit maps, shard crystal form, subunit D (stereo  
 41 representation). Images of the BlaC reaction with ceftriaxone, from 30 ms to 2 s. Panels  
 42 are labeled with the same letters as in Fig. 2 (main text). Green: SA-omit difference  
 43 density on the 2.5  $\sigma$  contour level. Blue: ligand main structural component, gray: minor  
 44 structural component.

45

46

47



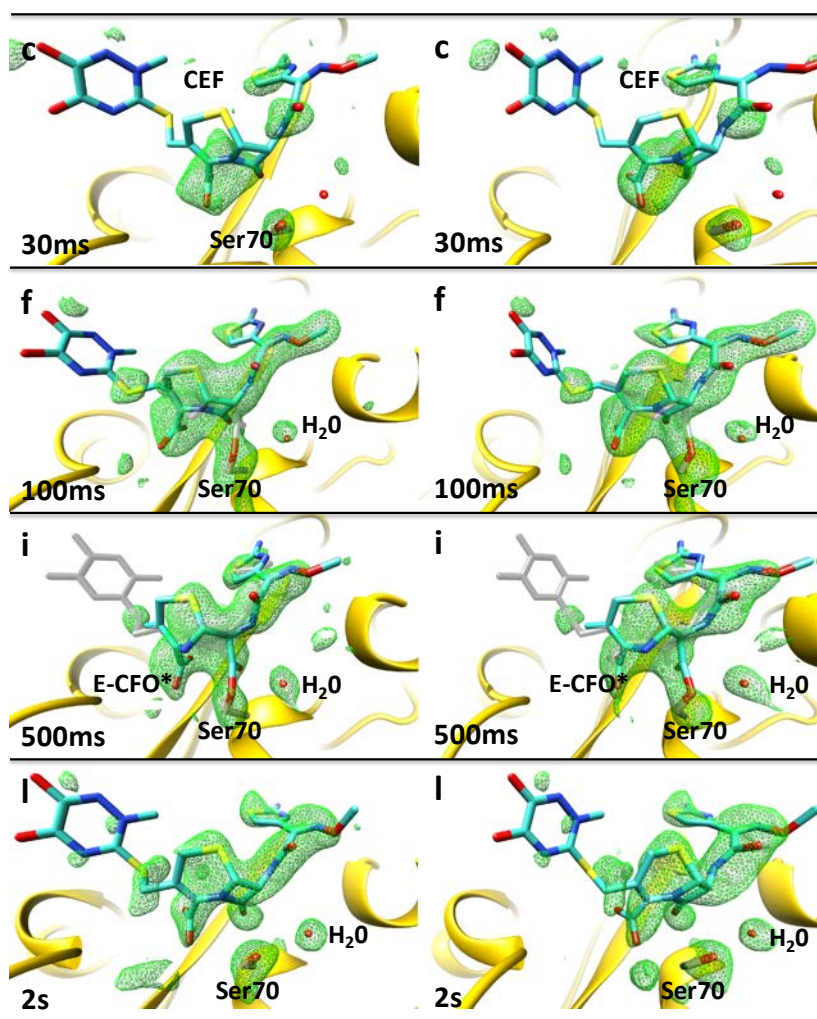

48

49 **Figure S5.** Simulated annealing omit maps, needle crystal form (stereo representation).  
 50 Images of the BlaC reaction with ceftriaxone, from 30 ms to 2 s. Panels are labeled with  
 51 the same letters as in Fig. 2 (main text). Green: SA-omit difference density, 2.5  $\sigma$  contour  
 52 level. Blue: main ligand component, gray: minor ligand component. The Ser-70 and the  
 53 nearby water are marked.

54

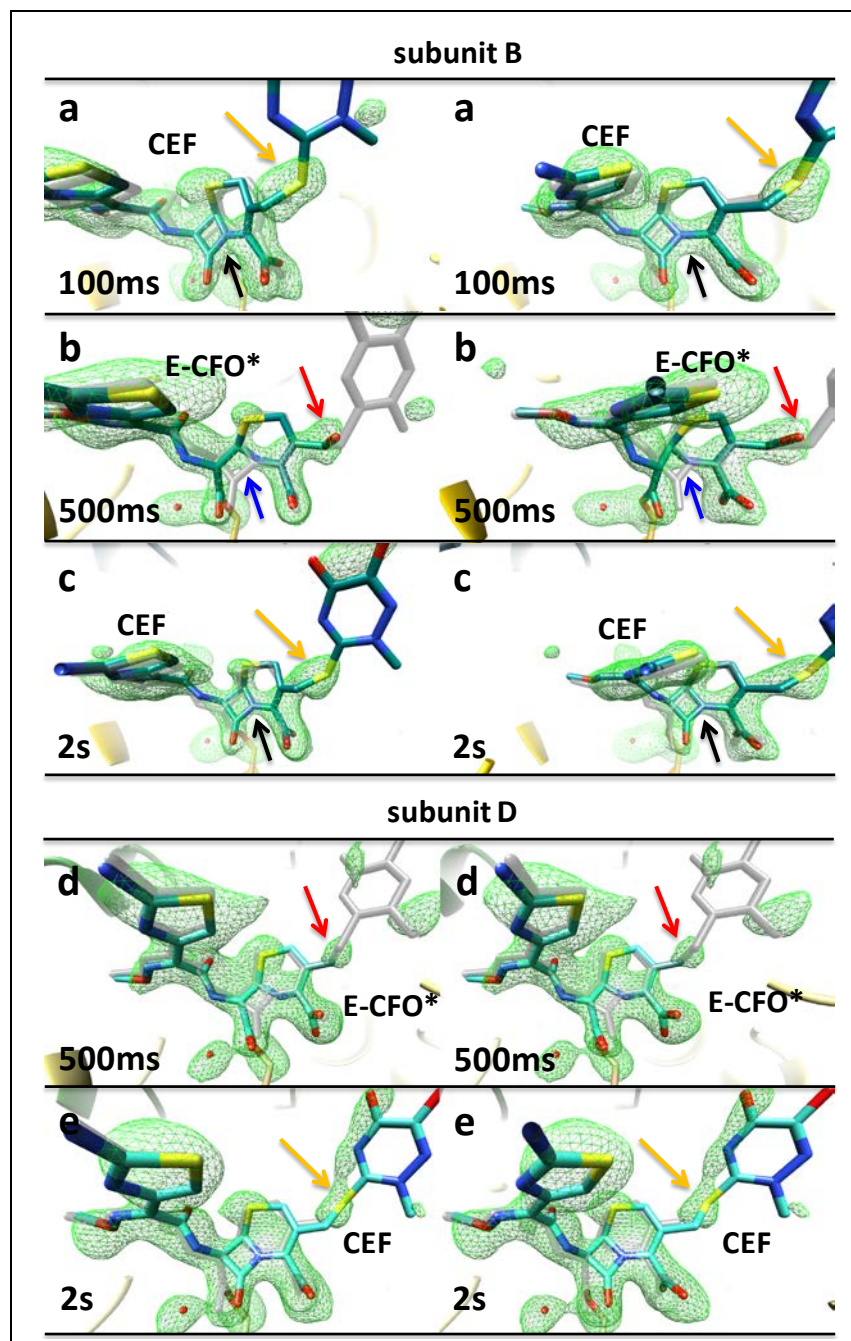

55 **Figure S6.** Backside view (stereo representation) of ceftriaxone binding to the catalytic  
 56 cleft of BlaC, subunit B (a,b,c) and D (d,e) of the BlaC shard crystal form at various time  
 57 delays, mFo-DFc SA omit electron density (green) contoured at  $2.5 \sigma$ . The electron  
 58 density is interpreted by different ceftriaxone species: main species in blue and minor  
 59 species in gray. **(a)** Electron density at 100 ms (subunit B). Presence of prominent  
 60 electron density for sulfur (orange arrow) and lactam ring nicely fits the electron density  
 61 (black arrow) **(b)** Electron density at 500 ms (subunit B). Lactam ring is open (blue arrow),  
 62 the absence of electron density for the sulfur (red arrow) is interpreted as the detachment



63 of R group, followed by the formation of an alcohol. **(c)** Electron density at 2 s (subunit  
64 B). Presence of prominent electron density for sulfur (orange arrow) and the lactam ring  
65 nicely fits the electron density (black arrow). The electron density is interpreted with a full  
66 length CEF structure. **(d)** Electron density at 500 ms (subunit D). Absence of electron  
67 density for the sulfur (red arrow) is interpreted as the detachment of R group. **(e)** Electron  
68 density at 2 s (subunit D). Reappearance of prominent electron density for the sulfur  
69 (orange arrow) and for the dioxo-triazine ring.

70

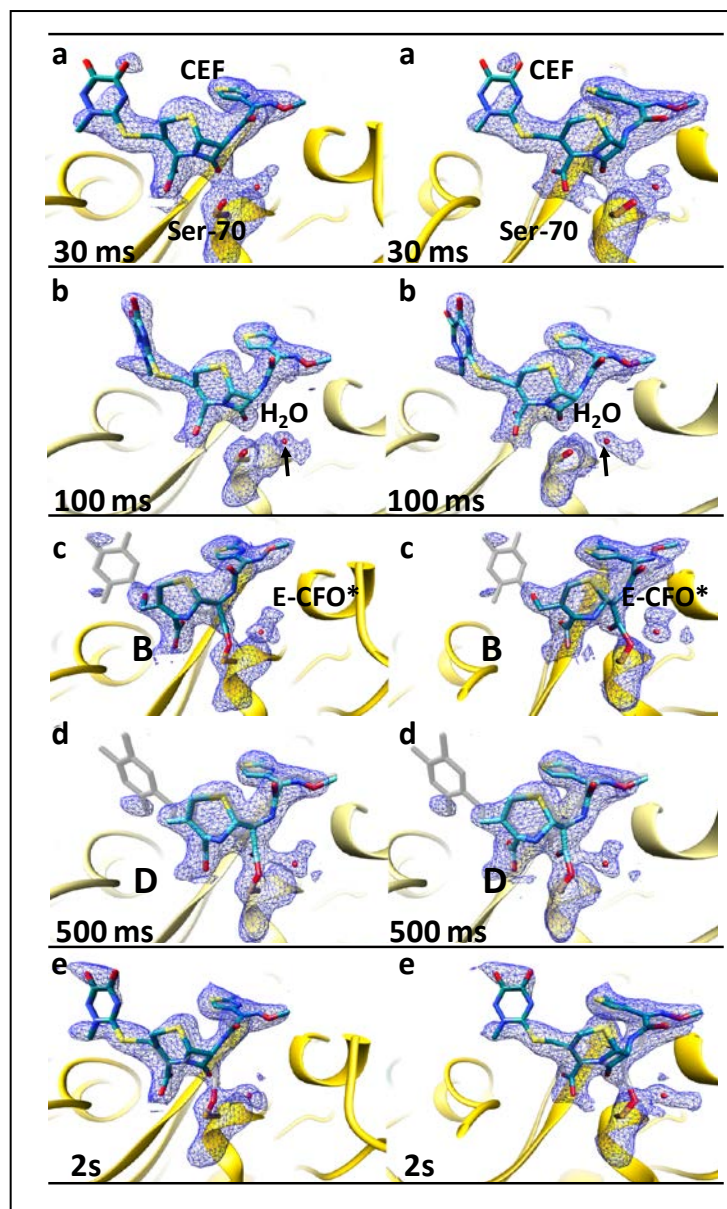

72 **Figure S7.** 2mFo-DFc electron density (blue, contour 1.1  $\sigma$ , stereo representation) in  
 73 the catalytic clefts of subunit B (a,c,e), and subunit D (b,d) of BlaC shard crystal form at  
 74 different time delay after mixing. The main species is displayed in blue and the minor  
 75 species in gray. (a) ES complex with the full length CEF non-covalently attached to the  
 76 active site, (b) mixture of CEF and the covalently bound E-CFO\* at 100 ms, (c) and (d)  
 77 the covalently bound E-CFO\* is the main component, (2s) reappearance of the full  
 78 length CEF with a minor contribution of E-CFO\*.

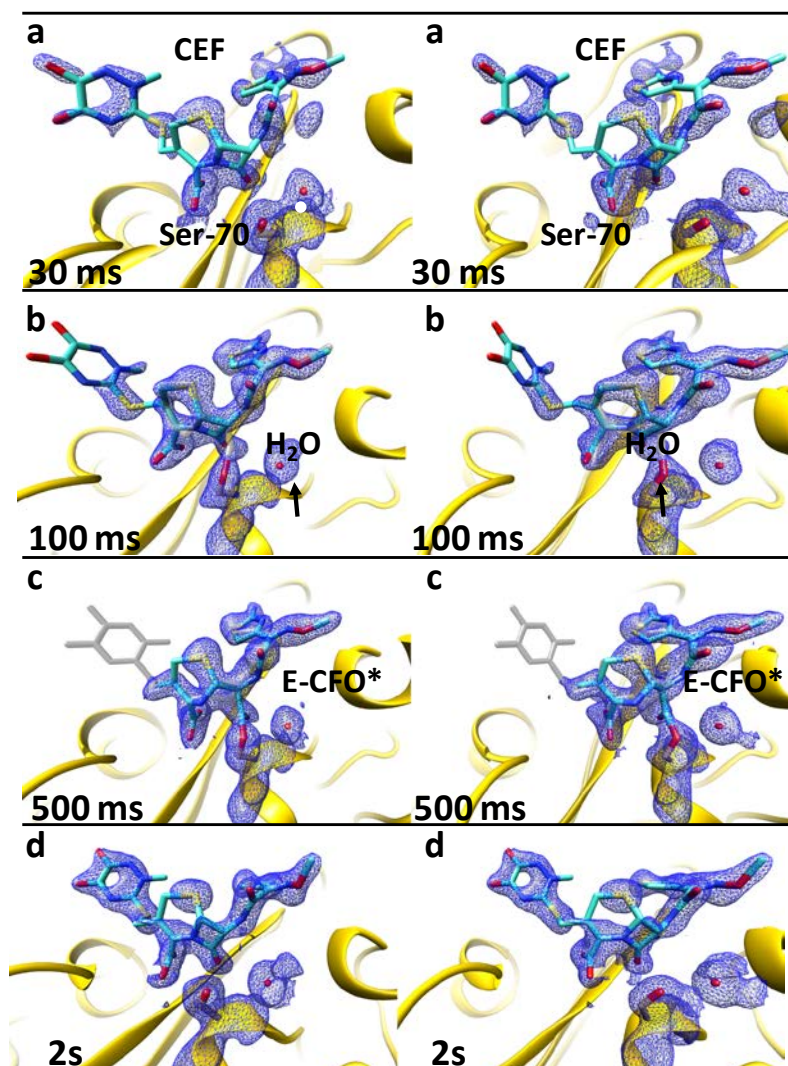

80 **Figure S8.** 2mFo-DFc electron density (blue, contour 1.1  $\sigma$ , stereo representation) in the  
 81 catalytic cleft of the BlaC needle crystal form at various time delays. The maps were  
 82 calculated using extrapolated structure factors  $F_o^{\text{ext}}$  (see text) with  $N=9$  for 30 ms and  
 83 100 ms delays,  $N=6$  for 500 ms and  $N=5$  for the 2 s delays. The electron density is  
 84 interpreted by various ceftriaxone species. The main species is displayed in blue and the  
 85 minor species in gray. **(a)** Formation of ES complex at 30 ms. The full length CEF model  
 86 (blue) is displayed in the active site. **(b)** Early phase of the formation of a covalently bound  
 87 E-CFO\* adduct observed at 100 ms. The full length CEF model (blue) is displayed  
 88 together with the minor E-CFO\* species (gray), where the  $\beta$ -lactam ring is open and  
 89 attached to Ser-70. **(c)** Fully cleaved and covalently bound adduct (E-CFO\* in blue) at  
 90 500 ms. A small admixture of full length CEF (gray) is present. **(d)** 2s, steady state, CEF  
 91 is dominant species as at 30 ms.

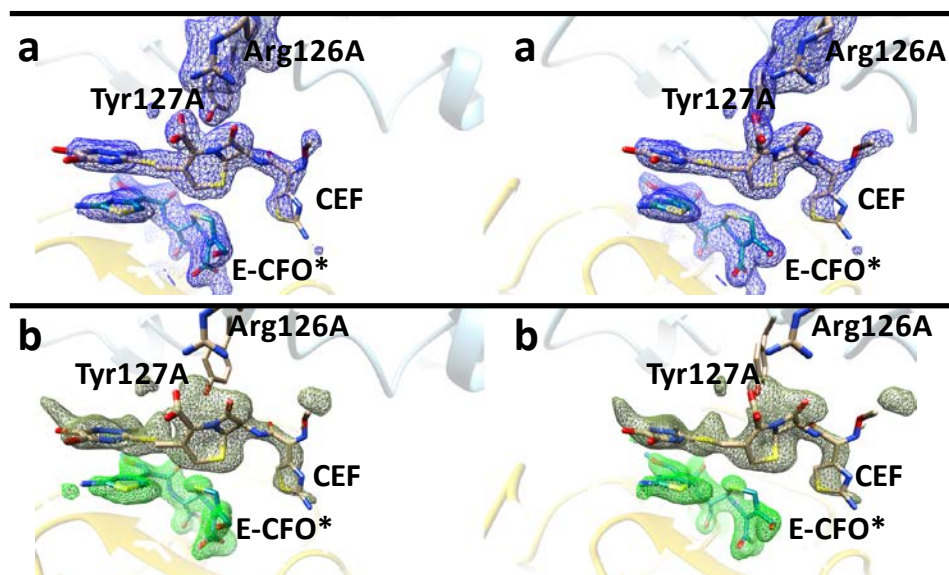

92 **Figure S9.** Details in the catalytic cleft of subunit B at 500 ms including the stacked  
 93 molecule, which interacts with the adjacent subunit A (stereo representation). Details in  
 94 subunit D with adjacent subunit C are similar. E-CFO\*: covalently bound acyl  
 95 intermediate, CEF: stacked full length ceftriaxone. (a) 2mFo-DFc electron density ( $1.1 \sigma$   
 96 contour level). (b) SA-omit maps ( $2.5 \sigma$  contour level for E-CFO\*, and  $2 \sigma$  for the CEF  
 97 region).

98

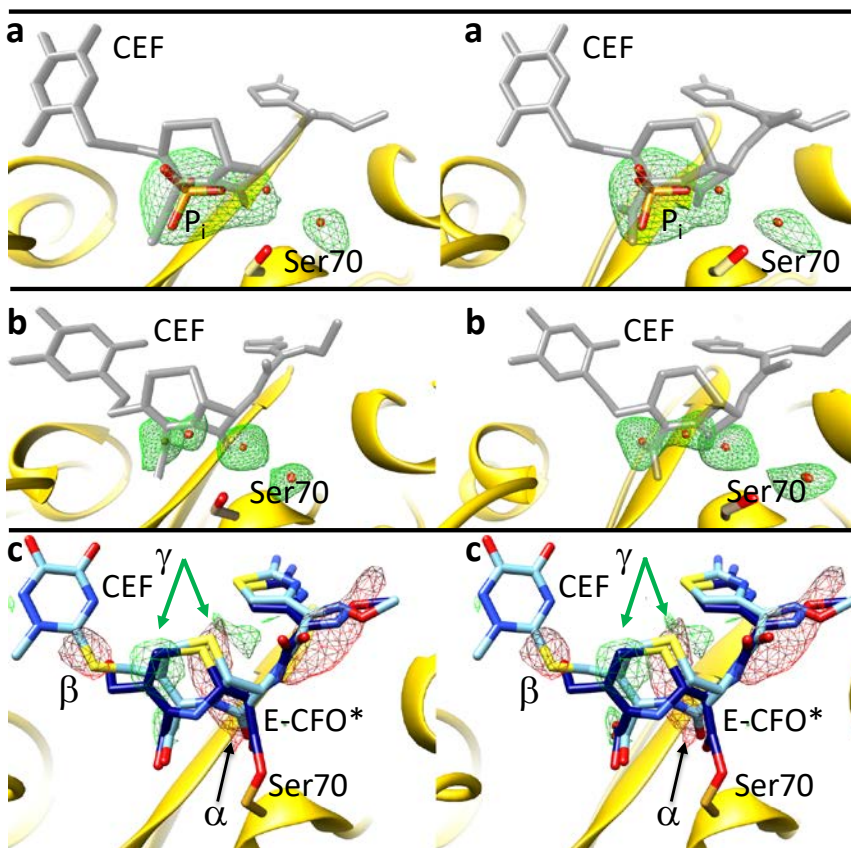

100 **Figure S10.** The catalytic cleft of BlaC. **(a)** Unmixed, ligand free structure of the BlaC  
 101 shard crystals grown in phosphate buffer (stereo representation). The phosphate (P<sub>i</sub>) is  
 102 marked. The CEF ligand as found at several time delays after mixing is displayed in gray  
 103 as a guide to the eye. Green electron density: mFo-DFc simulated annealing omit map  
 104 (2.5  $\sigma$  contour level) where all small molecules (water and phosphate) in the catalytic cleft  
 105 were removed. **(b)** Unmixed, ligand free structure of the BlaC needle crystals grown in  
 106 PEG (stereo representation). The CEF ligand as found at several time delays after mixing  
 107 is displayed in gray as a reference. Green electron density: mFo-DFc simulated annealing  
 108 omit map (2.5  $\sigma$  contour level) where all waters in the catalytic cleft were removed. **(c)**  
 109 Stereo representation of the F<sub>o</sub>(500 ms)-F<sub>o</sub>(100 ms) difference electron density map for  
 110 subunit B of the shard crystals (contour levels: red -2.5  $\sigma$ , green 2.5  $\sigma$ ). The full length  
 111 CEF model which is the major species at 100 ms and the covalently bound acyl adduct  
 112 (E-CFO\*) which is the major species at 500 ms are shown in light and dark blue,  
 113 respectively. The negative feature  $\alpha$  (black arrow) is located on the lactam ring carbonyl.  
 114 This shows that at 500 ms the carbonyl oxygen is displaced, the lactam ring is open, and  
 115 the covalent adduct has formed. The negative feature  $\beta$  points to a higher sulfur  
 116 occupancy at 100 ms compared to the 500 ms delay. This is evidence that the leaving  
 117 group (R) detaches after 100 ms. The positive and negative density pairs on the



118 dihydrothiazine rings (indicated by 2 green arrows) show the shift of the ring positions  
119 from back (at 100 ms) to front (at 500 ms) after the lactam ring is opened.

120

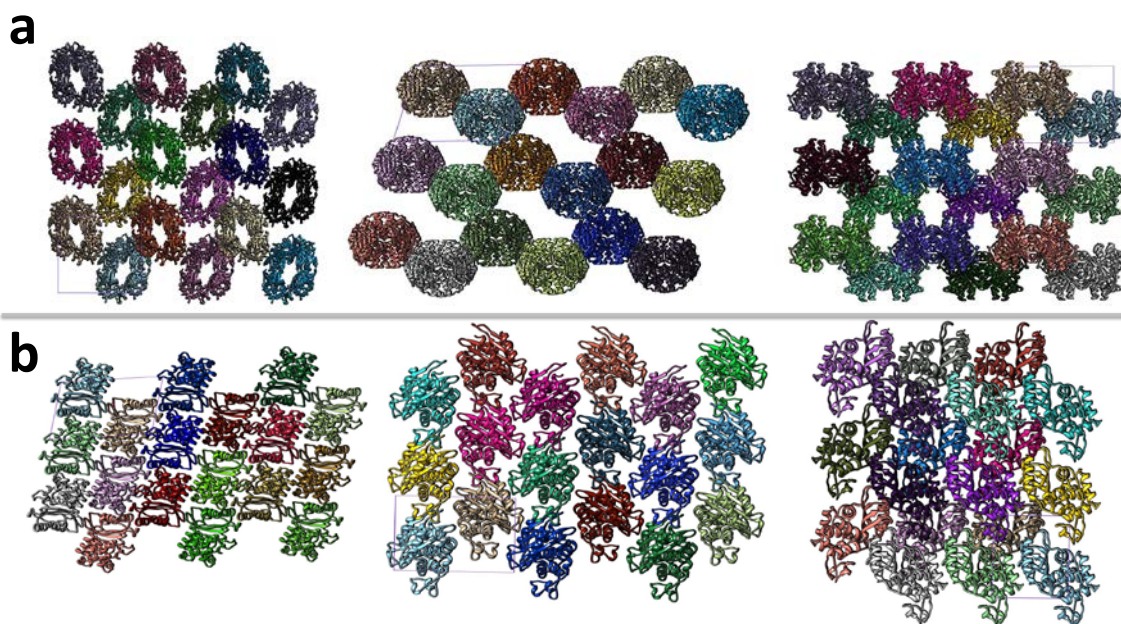

121

122 **Figure S11.** Crystal packing of BlaC in different crystal forms viewed from three different  
 123 directions normal to the unit cell surfaces. 27 unit cells (three each in the directions along  
 124 the unit cell axes) are displayed and viewed in orthographic projection. One of the unit  
 125 cells is outlined for each respective view with faint purple lines. The unit cell volume of the  
 126 shard crystal form is on the order of  $805,000 \text{ \AA}^3$  with 8 subunits in the unit cell (four  
 127 molecules/asymmetric unit). The concentration of BlaC subunits is 16 mmol/L. The unit  
 128 cell volume of the needles is about  $110,600 \text{ \AA}^3$  with 2 monomers in the unit cell. The  
 129 concentration of BlaC is 33 mmol/L. (a) Shards, displaying large solvent channels in all 3  
 130 directions. (b) Needles, solvent channels are substantially smaller. Note, the display is  
 131 not to scale. BlaC monomers in (b) appear larger than BlaC subunits in (a).

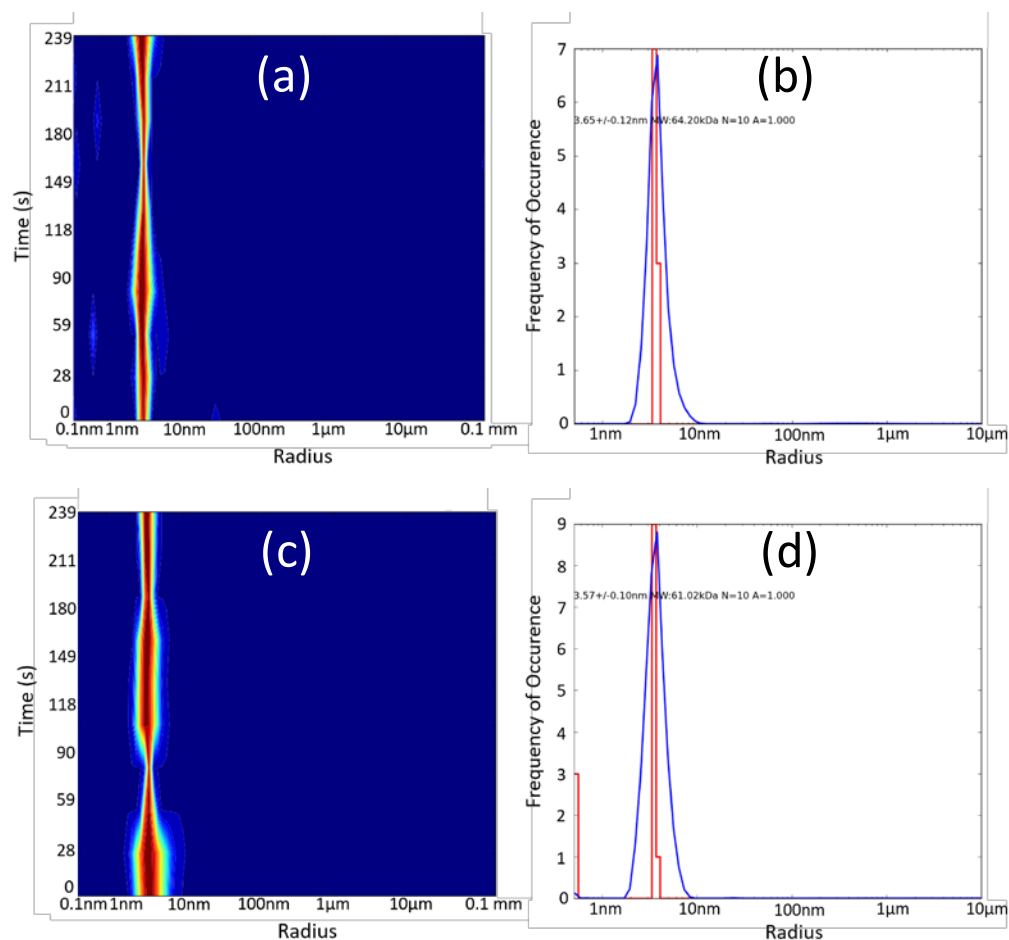

133 **Figure S12.** Dynamic Light Scattering on BlaC at 40 mg/mL at pH 5 using a DynaPro  
 134 NanoStar M3300 (WYATT TECHNOLOGY). A 120 mW laser of 660 nm was used as the  
 135 light source. For each measurement, the number of acquisitions was 10 and each  
 136 acquisition time was 20 s. All measurements were carried out at 20 °C. (a) and (b) in 100  
 137 mmol/L Na-acetate buffer, (c) and (d) in 100 mmol/L Na-phosphate buffer. (a) and (c)  
 138 show size distribution over time. (b) and (d) show the radius distribution. A very  
 139 monodisperse species is present. From (b) and (d) accurate molecular weights can be  
 140 calculated: (a) 64.2 kDa, (b) 61.0 kDa. The mass of a BlaC monomer is 30.6 kDa (1).  
 141 The BlaC exists as a dimer at this pH in both buffers. Essentially the same result is  
 142 obtained with 20 mg/mL BlaC.

143  
 144

145 **Table S1.** Average B-values for the various ceftriaxone species in the shard crystal form  
 146 obtained with various refinement strategies: (i) *Refined with CEF only*: the full length CEF  
 147 is inserted and refined. B-factors are separately listed for the active site full CEF and the  
 148 leaving group. (ii) *Refined with CEF and E-CFO\**: a mixture of CEF and E-CFO\* is refined  
 149 at 100 ms, 500 ms, and 2 s. For CEF, B-factors of the leaving group only are shown.  
 150 *Stacked CEF*: The B-factors of the stacked CEF are given in the last line.

151 **30ms**

|                              | <i>B-subunit [Å<sup>2</sup>]</i> | <i>D-subunit [Å<sup>2</sup>]</i> |
|------------------------------|----------------------------------|----------------------------------|
| <i>Refined with CEF only</i> |                                  |                                  |
| Full CEF                     | 69.95                            | 68.36                            |
| Leaving group                | 94.85                            | 98.81                            |
| <i>Stacked CEF</i>           | 100.96                           | 102.38                           |

152 **100ms**

|                                    |       |       |
|------------------------------------|-------|-------|
| <i>Refined with CEF only</i>       |       |       |
| Full CEF                           | 51.68 | 54.59 |
| Leaving group                      | 84.92 | 78.86 |
| <i>Refined with CEF and E-CFO*</i> |       |       |
| Leaving group                      | 76.94 | NA    |
| E-CFO*                             | 54.11 | NA    |
| <i>Stacked CEF</i>                 | 70.48 | 73.30 |

153 **500ms**

|                                    |       |       |
|------------------------------------|-------|-------|
| <i>Refined with CEF only</i>       |       |       |
| Full CEF                           | 59.03 | 53.96 |
| Leaving group only                 | 77.31 | 82.80 |
| <i>Refined with CEF and E-CFO*</i> |       |       |
| Leaving group                      | 60.89 | 66.88 |
| E-CFO*                             | 49.60 | 46.16 |
| <i>Stacked CEF</i>                 | 66.05 | 67.70 |

154 **2sec**

|                                    |       |       |
|------------------------------------|-------|-------|
| <i>Refined with CEF only</i>       |       |       |
| Full CEF                           | 47.64 | 44.37 |
| Leaving group                      | 64.49 | 64.67 |
| <i>Refined with CEF and E-CFO*</i> |       |       |
| Leaving group                      | 64.96 | 61.65 |
| E-CFO*                             | 52.58 | 46.33 |
| <i>Stacked CEF</i>                 | 61.14 | 62.83 |

155

156
